# Supplementary material
Source: ML conference proceedings conference paper supplement (https://proceedings.mlr.press/v97/suzuki19a.html)
Supplement: Supplementary file [file suzuki19a-supp.pdf]

## A. Proof of Proposition 1

From the definition of  $C_{\preceq}(y)$ ,  $x \in C_{\preceq}(y)$  iff  $x \preceq y$ . Then, we will show that  $x \in C_{\preceq}(y) \Leftrightarrow C_{\preceq}(x) \subseteq C_{\preceq}(y)$ .

( $\Leftarrow$ ) This is obvious because  $x \in C_{\preceq}(x)$  holds.

( $\Rightarrow$ ) For arbitrary  $z \in C_{\preceq}(x)$ ,  $z \preceq x$  follows the definition of  $C_{\preceq}(x)$ . Likewise,  $x \preceq y$  follows  $x \in C_{\preceq}(y)$ . Then,  $z \preceq y$  holds because of the transitivity, which implies that  $C_{\preceq}(x) \subseteq C_{\preceq}(y)$ .  $\square$

## B. Proof of Proposition 2

### B.1. Non-negativity

We will demonstrate this proposition by contradiction. Assume  $d_W(\mathbf{x}, \mathbf{y}) < 0$ ; then,  $s_j := \mathbf{w}_j^\top(\mathbf{x} - \mathbf{y}) < 0$  holds for all  $j = 1, \dots, m$ . From the assumption  $\text{coni}(W) = \mathbb{R}^n$ , there exists  $a_1, \dots, a_m \geq 0$  such that  $\mathbf{x} - \mathbf{y} = \sum_{j=1}^m a_j \mathbf{w}_j$ . Therefore,

$$\begin{aligned} \|\mathbf{x} - \mathbf{y}\|^2 &= (\mathbf{x} - \mathbf{y})^\top (\mathbf{x} - \mathbf{y}) \\ &= \sum_{j=1}^m a_j \mathbf{w}_j^\top (\mathbf{x} - \mathbf{y}) = \sum_{j=1}^m a_j s_j. \end{aligned} \quad (\text{B.1})$$

Considering  $a_j \geq 0$  and  $s_j < 0$ ,  $\|\mathbf{x} - \mathbf{y}\|^2 < 0$  leads to a contradiction.

### B.2. Identity of indiscernibles

If  $d_W(x, y) = 0$ ,  $s_j \leq 0$  holds for all  $j = 1, \dots, m$ . Considering  $a_j \geq 0$  and  $s_j \leq 0$  in (B.1), we obtain  $\|\mathbf{x} - \mathbf{y}\|^2 \leq 0$ ; then,  $\mathbf{x} = \mathbf{y}$ .

### B.3. Subadditivity

$$\begin{aligned} d_W(\mathbf{x}, \mathbf{y}) &= \max_j \{\mathbf{w}_j^\top (\mathbf{x} - \mathbf{y})\} \\ &= \max_j \{\mathbf{w}_j^\top (\mathbf{x} - \mathbf{z}) + \mathbf{w}_j^\top (\mathbf{z} - \mathbf{y})\} \\ &\leq \max_j \{\mathbf{w}_j^\top (\mathbf{x} - \mathbf{z})\} + \max_j \{\mathbf{w}_j^\top (\mathbf{z} - \mathbf{y})\} \\ &= d_W(\mathbf{x}, \mathbf{z}) + d_W(\mathbf{z}, \mathbf{y}). \quad \square \end{aligned}$$

## C. Proof of Theorem 1

Condition (16) is equivalent to  $\max_k \{x_k - y_k\} \leq 0$ . Thus, we will show that  $\max_k \{x_k - y_k\} = d(\mathbf{x}', \mathbf{y}') - r_x + r_y$  if  $\phi_{\text{ord}}(\mathbf{x}) = (\mathbf{x}', r_x)$ ,  $\phi_{\text{ord}}(\mathbf{y}) = (\mathbf{y}', r_y)$ .

Let  $P_\perp = I - P = \frac{1}{n} \mathbf{1}\mathbf{1}^\top$ ; then,

$$\begin{aligned} \max_k \{x_k - y_k\} &= \max_k \{\mathbf{e}_k^\top (\mathbf{x} - \mathbf{y})\} \\ &= \max_k \{\mathbf{e}_k^\top (P + P_\perp)(\mathbf{x} - \mathbf{y})\}. \end{aligned}$$

Here, considering  $P_\perp \mathbf{e}_k = \frac{1}{n} \mathbf{1}$ ,  $P \mathbf{e}_k = \mathbf{w}_k$ ,  $P^2 = P$ , we find

$$\begin{aligned} \max_k \{x_k - y_k\} &= \max_k \{\mathbf{w}_k P(\mathbf{x} - \mathbf{y})\} + \frac{\mathbf{1}^\top \mathbf{x}}{n} - \frac{\mathbf{1}^\top \mathbf{y}}{n} \\ &= \max_k \{\mathbf{w}_k (\mathbf{x}' - \mathbf{y}')\} + (a - r_x) - (a - r_y) \\ &= d_W(\mathbf{x}', \mathbf{y}') - r_x + r_y. \quad \square \end{aligned} \quad (\text{C.2})$$

### D. Proof of Theorem 2

By using a uniform norm in (18) instead of a Euclidean norm,

$$\begin{aligned} \|h_+(\mathbf{x} - \mathbf{y})\|_\infty &= \max_k \{|h_+(x_k - y_k)|\} \\ &= h_+\left(\max_k \{x_k - y_k\}\right) \\ &= h_+(d_W(\mathbf{x}', \mathbf{y}') - r_x + r_y) \\ &= h_+(l_{xy}), \end{aligned} \tag{D.3}$$

where  $l_{xy} = l(\mathbf{x}', r_x; \mathbf{y}', r_y)$  and  $h_+$  is applied element-wise. We used (C.2) for the third equation of (D.3).

From the inequality between the uniform norm and the Euclidean norm  $\|\mathbf{x}\| \geq \|\mathbf{x}\|_\infty$ , we find

$$E^{\text{ord}}(\mathbf{x}, \mathbf{y}) = \|h_+(\mathbf{x} - \mathbf{y})\|^2 \geq \|h_+(\mathbf{x} - \mathbf{y})\|_\infty^2 = h_+(l_{xy})^2.$$

The equality holds iff

$$\|h_+(\mathbf{x} - \mathbf{y})\| = \|h_+(\mathbf{x} - \mathbf{y})\|_\infty,$$

i.e.,

$$|\{k | h_+(x_k - y_k) \neq 0\}| \leq 1. \quad \square$$

### E. Proof of Theorem 3

We first prove Theorem 4 and then use our results to prove Theorem 3. Thus, see Sec. F first.

By eliminating  $d_x$  from (F.5) and (F.11), we obtain

$$\sin(r_x + \theta_0) = \frac{1 + \|\mathbf{x}\|^2}{2\|\mathbf{x}\|} \sin \theta_0,$$

which is followed by (21).

The equivalence of ordering (3) and (20) is directly derived from Theorem 4 since

$$E_{ij}^{\text{hyp}} \leq 0 \Leftrightarrow l_{ij} \leq 0. \quad \square \tag{E.4}$$

### F. Proof of Theorem 4

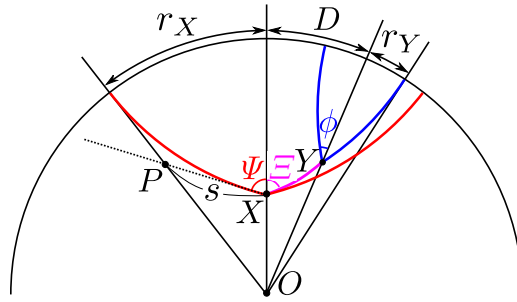

Figure 5. Hyperbolic Entailment cones.

To obtain (23), we present  $\psi - \Xi$  in Figure 5 as a function of  $r_X$ ,  $r_Y$ , and  $D$ . Let  $d_x$ ,  $d_y$ , and  $d_{xy}$  be

$$\begin{aligned} d_x &= d_{\mathbb{D}}(O, X) \\ d_y &= d_{\mathbb{D}}(O, Y) \\ d_{xy} &= d_{\mathbb{D}}(X, Y) \end{aligned}$$

and  $x$  and  $y$  be

$$x = \|\mathbf{x}\| = \tanh \frac{d_x}{2}. \quad (\text{F.5})$$

$$y = \|\mathbf{y}\| = \tanh \frac{d_y}{2}. \quad (\text{F.6})$$

Assume that  $XP = s$  in the Euclidean triangle  $\triangle OPX$ ; then,  $OP = 1 - s$ . Thus,

$$(1 - s) \sin r_X = s \sin \psi. \quad (\text{F.7})$$

By applying the law of cosines to  $\angle POX$ , it is shown that

$$s^2 = x^2 + (1 - s)^2 - 2x(1 - s) \cos r_X. \quad (\text{F.8})$$

By removing  $s$  from (F.7) and (F.8) and substituting (F.5), we have

$$\sin \psi = \frac{\sin r_X}{\cosh d_x - \sinh d_x \cos r_X}. \quad (\text{F.9})$$

In addition, from the assumption of Hyperbolic Cones (Ganea et al., 2018),

$$\sin \psi = K \frac{1 - x^2}{x} = \frac{2K}{\sinh d_x}. \quad (\text{F.10})$$

Comparing the right-hand side of equations (F.9) and (F.10), we have

$$\coth d_x = \cos r_X + \frac{1}{2K} \sin r_X = \frac{\sin(r_X + \theta_0)}{\sin \theta_0} \quad (\text{F.11})$$

where  $\theta_0 = \arctan 2K$ .

In the same manner, we have

$$\coth d_y = \frac{\sin(r_Y + \theta_0)}{\sin \theta_0}. \quad (\text{F.12})$$

By substituting (F.11) into (F.10),

$$\begin{aligned} \sin \psi &= 2K \sqrt{\coth^2 d_x - 1} \\ &= \tan \theta_0 \sqrt{\frac{\sin^2(r_X - \theta_0)}{\sin^2 \theta_0} - 1} \\ &= \frac{\sqrt{\sin(r_X) \sin(r_X + 2\theta_0)}}{\cos \theta_0}. \end{aligned} \quad (\text{F.13})$$

Applying the law of sines and the law of cosines to the hyperbolic triangle  $\triangle OXY$ , we have

$$\sinh d_y \sin D = \sinh d_{xy} \sin \Xi, \quad (\text{F.14})$$

$$\cos D = \frac{\cosh d_x \cosh d_y - \cosh d_{xy}}{\sinh d_x \sinh d_y}. \quad (\text{F.15})$$

By eliminating  $d_{xy}$  from (F.14) and (F.15), and substituting (F.11) and (F.12), it is finally shown that

$$\sin(\Xi - \psi) = 2 \sin\left(\frac{r_X - r_Y - D}{2}\right) \frac{\cos\left(\frac{r_X + r_Y - D}{2} + \theta_0\right)}{\cos \theta_0 \sin \theta_0} \sqrt{\frac{\sin r_X \sin(r_X + 2\theta_0)}{s_X^2 + s_Y^2 - 2s_X s_Y \cos D - \sin^2 D}}, \quad (\text{F.16})$$

where

$$s_X = \frac{\sin(r_X + \theta_0)}{\sin \theta_0}, s_Y = \frac{\sin(r_Y + \theta_0)}{\sin \theta_0}.$$

## G. Euclidean Entailment Cones

Similar to Hyperbolic Cones (Ganea et al., 2018), Euclidean Cones are also considered as Disk Embeddings. Here, we will show that  $\psi - \Xi$  in Euclidean entailment cones is also represented by  $R_x$ ,  $R_y$  and  $D$ .

Let  $d_x$ ,  $d_y$ , and  $d_{xy}$  be

$$\begin{aligned} d_x &= d(O, X) = x, \\ d_y &= d(O, Y) = y, \\ d_{xy} &= d(x, y). \end{aligned}$$

(G.17), (G.18), and (G.19) are determined by applying the law of sines to  $\triangle OAB$  and  $\triangle OXY$ :

$$\frac{\sin(\psi - R_x)}{x} = \sin \psi, \quad (\text{G.17})$$

$$\frac{\sin(\phi - R_y)}{y} = \sin \phi, \quad (\text{G.18})$$

$$\frac{\sin \Xi}{y} = \frac{\sin D}{d_{xy}}. \quad (\text{G.19})$$

Moreover, for Euclid entailment cones,

$$\sin \psi = \frac{K}{x}, \quad (\text{G.20})$$

$$\sin \phi = \frac{K}{y}. \quad (\text{G.21})$$

$$(\text{G.22})$$

By applying the law of cosines to  $\triangle OXY$ , we obtain  $d_{xy}$ :

$$d_{xy}^2 = x^2 + y^2 - 2xy \cos D. \quad (\text{G.23})$$

We represent  $\psi - \Xi$  as  $r_X$ ,  $r_Y$ ,  $d_{xy}$ , and  $K$ . By eliminating  $x$ ,  $y$ ,  $d_{xy}$ , and  $\phi$  from (G.17) to (G.23), it is finally shown that

$$\sin(\psi - \Xi) = \frac{2\sigma_X \cos\left(\frac{r_X - r_Y - D}{2}\right) \sin\left(\frac{r_X + r_Y - D}{2} + \xi_0\right)}{\sqrt{\sigma_X^2 + \sigma_Y^2 - 2\sigma_X \sigma_Y \cos D}}, \quad (\text{G.24})$$

where  $\sigma_X = \sin(r_X + \xi_0)$ ,  $\sigma_Y = \sin(r_Y + \xi_0)$  and  $\xi_0 = \arcsin K$ .

## H. Loss functions for Hyperbolic Entailment Cones in Disk Embedding format

In Figure 6, we illustrate values of energy function (23) for  $l_{ij}$  with fixed  $r_i, r_j$ .

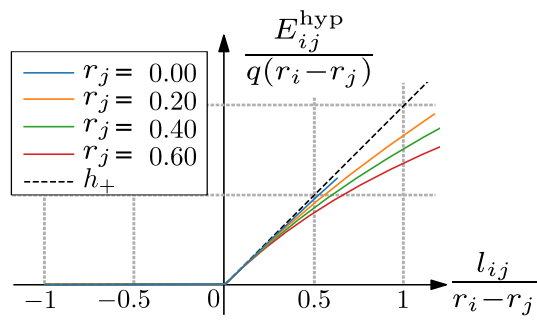

Figure 6. Values of  $E_{ij}^{\text{hyp}}$  for  $l_{ij}$  with fixed  $r_i, r_j$ .
